# Supplementary material
Source: publisher figshare collection journal article supplement (https://geolsoc.figshare.com/ndownloader/files/5426771)
Supplement: Supplementary file 1 [file 5426771]

dist	40Ar	+-	39Ar	+-	38Ar	+-	37A	+-	36Ar	+-	40Ar/39Ar	+-	AGE	+-
1	206.0400	1.0198	8.1000	0.0447	0.1800	0.0200	1.1400	0.1077	0.1000	0.0200	25.44	0.19	544	8
2	333.6000	0.9508	6.8200	0.0447	0.1400	0.0200	0.5400	0.1000	0.0000	0.0200	48.91	0.35	933	13
3	154.5600	1.0385	5.8800	0.0894	0.3000	0.0200	0.7400	0.0721	0.1400	0.0447	26.29	0.44	560	17
4	449.2400	1.1271	13.4800	0.0894	0.4200	0.0447	1.3800	0.0721	0.3400	0.0447	33.33	0.24	685	10
5	538.4800	1.1662	15.2000	0.0894	0.3400	0.0447	1.4600	0.0600	0.2200	0.0447	35.43	0.22	720	10
6	494.7400	1.5048	14.6400	0.0894	0.4000	0.0000	1.3400	0.0447	0.1000	0.0200	33.79	0.23	693	10
7	475.8600	1.3944	13.8000	0.0894	0.2800	0.0400	1.3800	0.0200	0.2200	0.0200	34.48	0.25	704	10
8	371.4200	1.4166	12.0400	0.1442	0.2000	0.0400	0.7400	0.0200	0.1400	0.0200	30.85	0.39	642	15
9	424.9800	0.5909	12.9000	0.0721	0.2000	0.0400	0.9000	0.0721	0.1600	0.0400	32.94	0.19	678	9
10	444.6600	0.4870	12.6000	0.0894	0.0000	0.0447	0.5800	0.0721	0.0000	0.0200	35.29	0.25	718	10
11	499.3400	0.8544	15.7200	0.0894	0.1400	0.0200	0.6200	0.0600	0.0000	0.0200	31.76	0.19	658	9
12	480.9800	0.5188	15.2400	0.1131	0.2600	0.0200	0.7400	0.0721	0.0600	0.0200	31.56	0.24	654	10
13	449.9200	1.1662	14.5000	0.1077	0.2200	0.1000	1.0000	0.1200	0.0000	0.1000	31.03	0.24	645	10
14	443.8800	1.1063	14.5800	0.1077	0.1800	0.1077	0.9600	0.1265	0.0600	0.1000	30.44	0.24	635	10
15	342.1600	1.0830	10.9000	0.1077	0.0000	0.1000	0.8800	0.1200	0.0200	0.1000	31.39	0.33	651	13
16	593.3600	0.4817	8.7800	0.0447	0.0200	0.0600	1.0800	0.0800	0.1000	0.0200	67.58	0.35	1192	13
17	633.0800	0.5122	9.4200	0.0447	0.1400	0.0600	1.4400	0.0800	0.1400	0.0200	67.21	0.32	1187	12
18	545.1600	0.6106	9.1400	0.0447	0.0600	0.0721	1.1200	0.0800	0.0200	0.0200	59.65	0.30	1086	12
19	591.5600	0.4252	9.2200	0.0447	0.2200	0.0600	1.4400	0.0894	0.1800	0.0200	64.16	0.31	1147	12
20	545.2400	2.6306	9.6400	0.0400	0.2800	0.1200	1.0200	0.1456	0.2000	0.0800	56.56	0.36	1044	13
21	480.7200	0.7879	9.8200	0.0721	0.1600	0.0400	1.1000	0.0447	0.0400	0.0000	48.95	0.37	934	13
22	538.2000	0.7725	10.3000	0.1000	0.2400	0.0400	1.2600	0.0200	0.0800	0.0000	52.25	0.51	982	17
23	653.3200	1.1370	10.7400	0.0721	0.3600	0.0400	1.1800	0.0447	0.0000	0.0000	60.83	0.42	1103	14
24	662.8600	0.6931	9.0400	0.0800	0.2400	0.0400	1.3800	0.1400	0.0000	0.0400	73.33	0.65	1264	19
25	796.7800	0.9434	9.4400	0.0894	0.2800	0.0400	1.1400	0.1400	0.0400	0.0400	84.40	0.81	1397	21
26	761.7000	0.6931	10.5200	0.0894	0.2000	0.0400	1.0200	0.1456	0.0000	0.0400	72.40	0.62	1253	18
27	764.3400	1.0121	9.3600	0.0894	0.2000	0.0400	1.1400	0.1400	0.0000	0.0400	81.66	0.79	1365	21
28	693.3000	1.8682	10.1600	0.1131	0.2800	0.0400	1.4600	0.1456	0.2000	0.0400	68.24	0.78	1200	22
29	633.0800	0.7889	8.4600	0.0721	0.1000	0.0200	1.4600	0.0721	0.1200	0.0000	74.83	0.64	1283	18
30	550.0000	0.7694	7.3800	0.0721	0.0000	0.0447	1.1800	0.0721	0.1600	0.0000	74.53	0.74	1279	20
31	489.0000	0.7088	6.8200	0.0721	0.2200	0.0200	1.6200	0.0600	0.1200	0.0400	71.70	0.77	1244	21
32	498.2400	0.5946	6.9800	0.0721	0.1600	0.0400	1.4600	0.1077	0.2200	0.0200	71.38	0.74	1240	21
33	466.2800	0.4883	7.3400	0.0721	0.2400	0.0400	1.3400	0.1077	0.2200	0.0200	63.53	0.63	1139	19
34	498.4000	0.6560	7.3800	0.0721	0.0000	0.0400	1.2600	0.1000	0.0000	0.0447	67.53	0.67	1191	19
35	443.2400	0.3225	6.5800	0.1077	0.2400	0.0800	1.1200	0.0566	0.2800	0.0400	67.36	1.10	1189	30
36	447.2800	0.3688	6.8200	0.1077	0.0800	0.0800	1.3600	0.0566	0.1600	0.0400	65.58	1.04	1166	28
37	494.3600	0.3688	7.5400	0.1077	0.0400	0.0800	1.7600	0.0400	0.0800	0.0400	65.56	0.94	1166	26
38	541.6800	0.5769	7.1200	0.0566	0.2200	0.0600	1.4000	0.0400	0.1600	0.0400	76.08	0.61	1298	17
39	451.3000	0.5235	8.0800	0.0566	0.1400	0.0200	0.8800	0.0800	0.0000	0.0200	55.85	0.40	1034	14
40	467.4600	0.8421	6.5600	0.0566	0.1800	0.0200	1.0400	0.0894	0.0000	0.0200	71.26	0.63	1239	18
41	409.4200	0.2474	5.3600	0.0400	0.1400	0.0200	1.1600	0.0800	0.0600	0.0200	76.38	0.57	1302	17
42	414.5800	0.1709	6.0000	0.0400	0.0600	0.0200	0.8400	0.0894	0.0000	0.0200	69.10	0.46	1211	15
